# Supplementary material
Source: Springer Nature journal article supplement (https://www.springermedizin.de/resource/supplementary/12984_2011_338_MOESM8_ESM.pdf/9605808)

Hand

Tongue

A

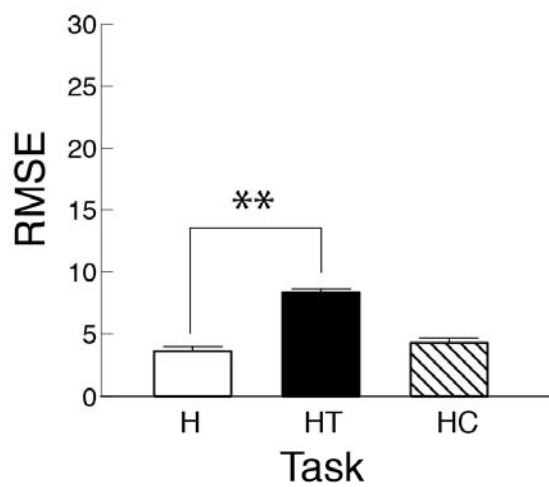

B

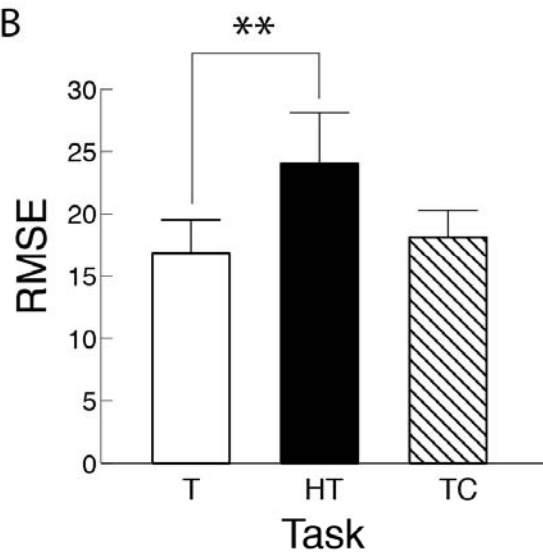

C

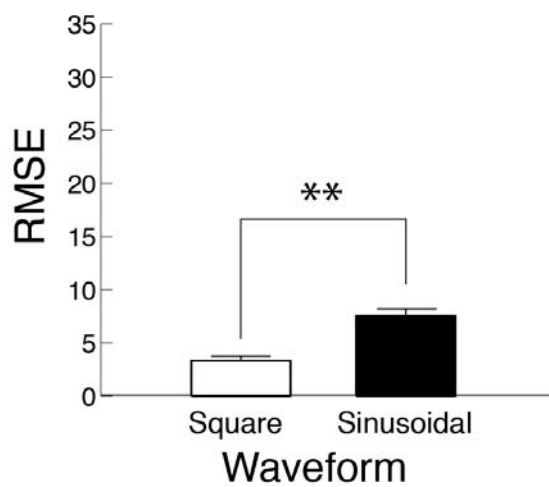

D

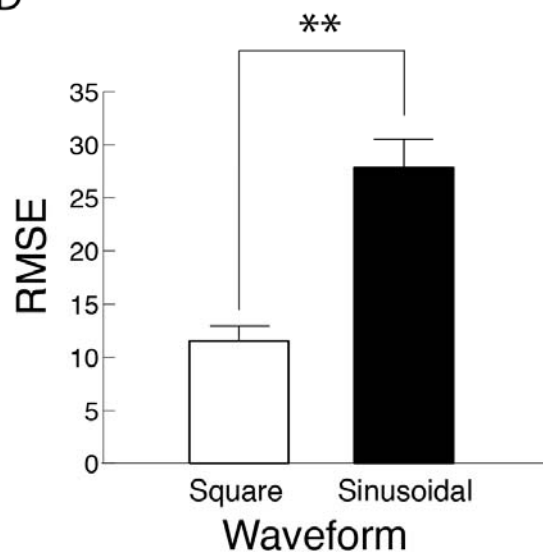

Figure 9

Supplement: MOESM8 [file 9605808]
